# Supplementary material for: Systematic identification of recognition motifs for the hub protein LC8
Source: Life Sci Alliance. 2019 Jul 2;2(4):e201900366. doi: 10.26508/lsa.201900366 (PMC6607443; doi:10.26508/lsa.201900366)
Supplement: Supplementary file 2 [file LSA-2019-00366_TableS2.xlsx]

## Sheet: Sheet1
Supplemental Table 2 - LC8Pred scan of the human proteome reveals 378 likely binding sequences.
Uniprot	Seq start	Seq end	Sequence	Saa	Svp	gene name	Protein Name	LC8Hub?a	Mentha?b	IUPred Scorec
Q6P1L5	245	253	RDKATQTE	26.5989	8.47563	F117B	HUMAN Protein FAM117B	0	1	0.748663
Q96GM5	460	468	RDLKTMTD	13.9531	7.90491	SMRD1	HUMAN SWI/SNF-related matrix-associated actin-dependent regulator of chromatin subfamily D member 1	0	0	0.563937
P18583	90	98	RCVSVQTD	18.927	7.54175	SON	HUMAN Protein SON	1	0	0.722263
Q15560	249	257	RTGGTQTD	21.9654	7.52538	TCEA2	HUMAN Transcription elongation factor A protein 2	0	0	0.520138
Q9UPT6	314	322	RNMEVQVT	16.2981	7.51503	JIP3	HUMAN C-Jun-amino-terminal kinase-interacting protein 3	0	0	0.826512
Q9Y2J4	723	731	RDGSTQTE	20.1792	7.4673	AMOL2	HUMAN Angiomotin-like protein 2	1	1	0.970325
Q9Y4B5	1633	1641	RTMGTQTV	20.9578	7.18823	MTCL1	HUMAN Microtubule cross-linking factor 1	0	1	0.568025
Q9UI46	206	214	RDRECQTE	21.0367	7.18182	DNAI1	HUMAN Dynein intermediate chain 1, axonemal	0	0	0.919837
Q02127	308	316	RDLSTQTI	19.2851	7.13015	PYRD	HUMAN Dihydroorotate dehydrogenase (quinone), mitochondrial	0	0	0.6009
Q9NS62	667	675	RSMSTLTP	17.8303	7.10241	THSD1	HUMAN Thrombospondin type-1 domain-containing protein 1	0	0	0.820475
P78563	156	164	RTLSVNTD	15.7998	6.98333	RED1	HUMAN Double-stranded RNA-specific editase 1	0	0	0.506838
O95886	655	663	HSIGVQVE	13.6692	6.90331	DLGP3	HUMAN Disks large-associated protein 3	0	0	0.586488
P28290	1161	1169	RTGSVQTP	16.0036	6.82298	ITPI2	HUMAN Protein ITPRID2	0	0	0.953525
Q8WXI7	6442	6450	RTIATQTG	23.3864	6.81888	MUC16	HUMAN Mucin-16	0	0	0.836375
Q9NY74	340	348	RSLSSQVD	13.9578	6.7336	ETAA1	HUMAN Ewing's tumor-associated antigen 1	0	0	0.583825
Q96NY8	451	459	REIETQTE	22.3826	6.71325	NECT4	HUMAN Nectin-4	0	0	0.794675
Q96D71	753	761	RNKETNTV	15.868	6.68423	REPS1	HUMAN RalBP1-associated Eps domain-containing protein 1	0	0	0.59265
Q4VCS5	859	867	RDCSTQTE	22.9714	6.59612	AMOT	HUMAN Angiomotin	1	1	0.799725
Q15555	237	245	KDLETQVI	14.0801	6.4925	MARE2	HUMAN Microtubule-associated protein RP/EB family member 2	0	0	0.599475
Q6DT37	712	720	RNVGTQTL	19.3597	6.42155	MRCKG	HUMAN Serine/threonine-protein kinase MRCK gamma	0	0	0.622188
Q9UQ26	1140	1148	RTGSVQTS	15.4386	6.38103	RIMS2	HUMAN Regulating synaptic membrane exocytosis protein 2	0	0	0.9762
Q7Z4T9	195	203	RDADVQTD	20.717	6.36628	CFA91	HUMAN Cilia- and flagella-associated protein 91	0	0	0.685362
Q8TDM6	837	845	HNNSTQTD	16.1579	6.35852	DLG5	HUMAN Disks large homolog 5	0	0	0.652663
Q8TD19	942	950	HSKGTQTA	17.532	6.33908	NEK9	HUMAN Serine/threonine-protein kinase Nek9	1	1	0.950175
Q14202	850	858	KSKGSQTE	19.9026	6.15559	ZMYM3	HUMAN Zinc finger MYM-type protein 3	0	1	0.50215
Q9BWV3	16	24	RSVSTQTG	20.9899	6.15041	CDAC1	HUMAN Cytidine and dCMP deaminase domain-containing protein 1	1	0	0.833063
Q9BYP7	879	887	RNRETQSP	15.7688	6.14589	WNK3	HUMAN Serine/threonine-protein kinase WNK3	0	0	0.64435
Q99550	908	916	KNWGTQTE	17.4471	6.13513	MPP9	HUMAN M-phase phosphoprotein 9	0	0	0.645463
Q8TDF5	449	457	RDASILTE	17.1979	6.1326	NETO1	HUMAN Neuropilin and tolloid-like protein 1	0	0	0.8752
Q8WXI7	6152	6160	KTIATQTG	20.7502	6.10141	MUC16	HUMAN Mucin-16	0	0	0.722525
Q70EL1	1574	1582	RSKGLQVP	13.5286	6.0912	UBP54	HUMAN Inactive ubiquitin carboxyl-terminal hydrolase 54	0	0	0.568638
Q8IY63	872	880	KDSSTQTD	20.6839	6.06267	AMOL1	HUMAN Angiomotin-like protein 1	1	0	0.69885
Q9BVV6	675	683	KSIRTQTD	16.6801	6.03831	TALD3	HUMAN Protein TALPID3	0	0	0.517925
P29475	233	241	KDMGIQVD	19.0586	5.9644	NOS1	HUMAN Nitric oxide synthase, brain	0	0	0.73375
P35712	106	114	RDREIMTS	17.9421	5.958	SOX6	HUMAN Transcription factor SOX-6	0	0	0.918438
Q2T9L4	263	271	RNSSTQTV	13.9441	5.95181	INSY1	HUMAN Inhibitory synaptic factor 1	0	0	0.826725
A2RUB6	607	615	KDTGVQTD	20.0316	5.84526	CCD66	HUMAN Coiled-coil domain-containing protein 66	0	0	0.534138
Q8WZ74	302	310	RSVACQTD	17.1638	5.83134	CTTB2	HUMAN Cortactin-binding protein 2	0	0	0.518262
Q86VQ1	343	351	RSIDTQTP	20.3975	5.81737	GLCI1	HUMAN Glucocorticoid-induced transcript 1 protein	1	1	0.83095
Q5T2D2	203	211	RTMGSQTV	16.6837	5.79742	TRML2	HUMAN Trem-like transcript 2 protein	0	0	0.94255
Q8NA54	265	273	HNAGTQTV	14.2555	5.78591	IQUB	HUMAN IQ and ubiquitin-like domain-containing protein	0	1	0.555063
P51948	201	209	KDRSTQLE	14.5886	5.76394	MAT1	HUMAN CDK-activating kinase assembly factor MAT1	0	0	0.700937
Q13043	341	349	RVASTMTD	14.023	5.75729	STK4	HUMAN Serine/threonine-protein kinase 4	0	0	0.626025
Q0D2I5	121	129	RDQAVQTG	16.7601	5.75405	IFFO1	HUMAN Intermediate filament family orphan 1	0	0	0.656475
Q6NYC8	346	354	RDIEAQTQ	16.0261	5.74655	PPR18	HUMAN Phostensin	0	0	0.927475
Q7Z6Z7	3354	3362	RTKETNCE	21.5699	5.73979	HUWE1	HUMAN E3 ubiquitin-protein ligase HUWE1	0	0	0.652887
P16144	1507	1515	RDYSTLTS	13.9339	5.69862	ITB4	HUMAN Integrin beta-4	0	0	0.692525
Q99996	1678	1686	RNSSTQTQ	17.5858	5.69517	AKAP9	HUMAN A-kinase anchor protein 9	0	1	0.609287
Q9UBY0	752	760	REKGTQTS	21.4467	5.67699	SL9A2	HUMAN Sodium/hydrogen exchanger 2	1	0	0.982012
O14513	1058	1066	RDIGLQTP	17.2852	5.65987	NCKP5	HUMAN Nck-associated protein 5	0	0	0.945325
O43719	25	33	KDGDTQTD	14.9993	5.64881	HTSF1	HUMAN HIV Tat-specific factor 1	0	0	0.957937
Q9NQB0	521	529	RDAKSQTE	17.8025	5.64524	TF7L2	HUMAN Transcription factor 7-like 2	0	0	0.980988
Q49MG5	300	308	KSKESQVT	13.9439	5.64442	MAP9	HUMAN Microtubule-associated protein 9	0	0	0.737513
Q5VST9	2439	2447	RTCSTMTG	16.3246	5.58246	OBSCN	HUMAN Obscurin	0	0	0.574575
Q9P266	686	694	RDQQTQTS	22.0376	5.56474	JCAD	HUMAN Junctional protein associated with coronary artery disease	0	0	0.775787
Q8NEM7	530	538	RTTATQVM	20.6531	5.55037	SP20H	HUMAN Transcription factor SPT20 homolog	0	0	0.592163
Q9NWB6	56	64	RSRSTNTA	15.4696	5.52724	ARGL1	HUMAN Arginine and glutamate-rich protein 1	0	0	0.85225
Q13409	155	163	YTKETQTP	22.7407	5.51338	DC1I2	HUMAN Cytoplasmic dynein 1 intermediate chain 2	0	1	0.8485
Q96L12	61	69	KDKGLQTT	14.23	5.51287	CALR3	HUMAN Calreticulin-3	0	0	0.576925
Q9P2E7	446	454	KSIQVQVS	13.8358	5.50669	PCD10	HUMAN Protocadherin-10	0	0	0.730738
Q5TZA2	1961	1969	RSAQAQTE	17.6194	5.42844	CROCC	HUMAN Rootletin	0	0	0.611225
Q5VTH9	298	306	KNKDVQCD	14.0553	5.38797	WDR78	HUMAN WD repeat-containing protein 78	0	0	0.523962
Q4L180	795	803	FSKEVQTE	18.5524	5.34518	FIL1L	HUMAN Filamin A-interacting protein 1-like	0	0	0.800575
Q8NCL8	207	215	RDADTQTP	22.1994	5.34428	TM116	HUMAN Transmembrane protein 116	0	0	0.549013
Q9H2D6	234	242	RHRSTLTQ	14.8631	5.306	TARA	HUMAN TRIO and F-actin-binding protein	0	0	0.883587
Q6T4R5	444	452	RDSECQTE	17.6494	5.28513	NHS	HUMAN Nance-Horan syndrome protein	0	0	0.703625
Q9UPV9	827	835	RSSESQTD	19.0797	5.25739	TRAK1	HUMAN Trafficking kinesin-binding protein 1	0	0	0.557037
Q5SYE7	263	271	RDSSCQTE	16.3753	5.20531	NHSL1	HUMAN NHS-like protein 1	0	0	0.756275
Q9Y2H9	1389	1397	RHQSVQTE	18.6137	5.18876	MAST1	HUMAN Microtubule-associated serine/threonine-protein kinase 1	1	0	0.767388
Q9P270	418	426	RTSNTQVD	15.8731	5.17264	SLAI2	HUMAN SLAIN motif-containing protein 2	0	0	0.7625
O14576	165	173	YSKETQTP	21.2252	5.10796	DC1I1	HUMAN Cytoplasmic dynein 1 intermediate chain 1	0	1	0.771312
A6NGY1	162	170	RALEVQTP	13.9317	5.09455	FRG2C	HUMAN Protein FRG2-like-2	0	0	0.712137
Q9HBL0	1182	1190	RTVGTNTP	19.8696	5.05908	TENS1	HUMAN Tensin-1	0	0	0.906025
Q99102	203	211	WTRSTQTT	19.687	5.05853	MUC4	HUMAN Mucin-4	1	0	0.752888
Q03060	21	29	KSAHVQTQ	16.766	5.01221	CREM	HUMAN cAMP-responsive element modulator	0	0	0.750587
Q5JTC6	633	641	RCRETQVR	15.2732	4.97664	AMER1	HUMAN APC membrane recruitment protein 1	0	0	0.597975
Q9Y227	404	412	KTNETQTS	18.8709	4.97438	ENTP4	HUMAN Ectonucleoside triphosphate diphosphohydrolase 4	0	0	0.614287
P49590	405	413	RTTETQVF	18.7574	4.93786	SYHM	HUMAN Probable histidine--tRNA ligase, mitochondrial	0	0	0.594925
O43829	228	236	KDLGSQTP	15.0807	4.88629	ZBT14	HUMAN Zinc finger and BTB domain-containing protein 14	0	0	0.943662
Q6P1M3	958	966	RNSGTQSD	13.6524	4.87178	L2GL2	HUMAN Lethal(2) giant larvae protein homolog 2	0	0	0.9726
Q9H4H8	437	445	RSTTTQTD	21.6597	4.86941	FA83D	HUMAN Protein FAM83D	1	1	0.607975
Q96AE4	95	103	QSRSVMTE	14.7812	4.84623	FUBP1	HUMAN Far upstream element-binding protein 1	0	0	0.71455
P55265	594	602	KTAESQTP	20.2828	4.79452	DSRAD	HUMAN Double-stranded RNA-specific adenosine deaminase	0	0	0.862825
Q8ND24	200	208	QNIAVQTD	19.4066	4.7754	RN214	HUMAN RING finger protein 214	0	0	0.546175
Q9Y2F5	490	498	MDKSVQTE	13.4867	4.75966	ICE1	HUMAN Little elongation complex subunit 1	1	0	0.650375
Q0VF49	756	764	RTEHIQTP	15.2677	4.74533	K2012	HUMAN Uncharacterized protein KIAA2012	0	0	0.88145
Q562F6	313	321	HTNETNTE	14.1751	4.70782	SGO2	HUMAN Shugoshin 2	0	0	0.89755
Q2T9L4	271	279	SDKSTQTV	17.2453	4.7055	INSY1	HUMAN Inhibitory synaptic factor 1	0	0	0.749587
O43521	109	117	CDKSTQTP	24.679	4.7055	B2L11	HUMAN Bcl-2-like protein 11	1	1	0.664175
Q64ET8	161	169	RALGVQTP	13.2682	4.69513	FRG2	HUMAN Protein FRG2	0	0	0.759513
Q5TEA6	32	40	RNVTTQVS	14.6334	4.68206	SE1L2	HUMAN Protein sel-1 homolog 2	0	0	0.637
O43313	644	652	SNIQTQTE	21.3644	4.65775	ATMIN	HUMAN ATM interactor	1	0	0.74305
Q7Z2K8	854	862	RDAGLQVS	13.4389	4.53307	GRIN1	HUMAN G protein-regulated inducer of neurite outgrowth 1	0	0	0.885725
P20916	607	615	KDSYTLTE	13.1942	4.50499	MAG	HUMAN Myelin-associated glycoprotein	1	0	0.5068
Q9NV58	611	619	NSMEVQVD	15.5575	4.4947	RN19A	HUMAN E3 ubiquitin-protein ligase RNF19A	0	0	0.56415
Q86W92	76	84	STAETLVE	14.2189	4.48902	LIPB1	HUMAN Liprin-beta-1	0	1	0.509912
Q8N4C6	2017	2025	RTSETNTP	18.5612	4.48513	NIN	HUMAN Ninein	0	0	0.91725
Q8N302	88	96	SDVEVQTE	18.7842	4.39755	AGGF1	HUMAN Angiogenic factor with G patch and FHA domains 1	0	0	0.699675
Q96L96	836	844	ADRKTQVD	14.9933	4.39306	ALPK3	HUMAN Alpha-protein kinase 3	0	0	0.923575
Q8IX07	952	960	SDKGVQTP	20.1381	4.3859	FOG1	HUMAN Zinc finger protein ZFPM1	1	0	0.965812
Q7Z4T9	186	194	STVGTQTD	22.7133	4.37581	CFA91	HUMAN Cilia- and flagella-associated protein 91	0	0	0.753475
Q99456	328	336	KEISTNTE	14.099	4.36947	K1C12	HUMAN Keratin, type I cytoskeletal 12	0	0	0.5587
Q9HCU0	536	544	RVAGTQTT	15.7142	4.34309	CD248	HUMAN Endosialin	0	0	0.900687
Q13905	461	469	RSAASQTA	15.5961	4.33782	RPGF1	HUMAN Rap guanine nucleotide exchange factor 1	0	0	0.814775
Q5VV17	447	455	WCKQTQVQ	14.3995	4.33522	OTUD1	HUMAN OTU domain-containing protein 1	0	0	0.53065
Q8TCU4	3762	3770	SDILTQTD	14.596	4.32851	ALMS1	HUMAN Alstrom syndrome protein 1	0	0	0.683675
Q9C0C7	1111	1119	QNAETQTE	24.6021	4.30595	AMRA1	HUMAN Activating molecule in BECN1-regulated autophagy protein 1	0	1	0.9211
Q9NSC5	266	274	KDQEIQTL	15.1409	4.28662	HOME3	HUMAN Homer protein homolog 3	0	1	0.603287
Q9ULM2	47	55	QSIKTQTD	19.5679	4.25833	ZN490	HUMAN Zinc finger protein 490	0	0	0.661725
Q9P121	112	120	YTCSVQTD	15.513	4.25645	NTRI	HUMAN Neurotrimin	0	0	0.64835
Q5VZL5	963	971	QNKECQTE	19.3231	4.24307	ZMYM4	HUMAN Zinc finger MYM-type protein 4	0	1	0.674663
O75319	297	305	RHFHTQTQ	18.1741	4.23166	DUS11	HUMAN RNA/RNP complex-1-interacting phosphatase	0	0	0.763487
Q9Y2H0	688	696	QSIGVQVE	16.6191	4.18597	DLGP4	HUMAN Disks large-associated protein 4	0	0	0.677638
Q53SF7	675	683	KDAAIQTT	17.6394	4.18495	COBL1	HUMAN Cordon-bleu protein-like 1	0	0	0.802538
O60765	92	100	TTKSTQTQ	18.7935	4.18475	Z354A	HUMAN Zinc finger protein 354A	0	0	0.647887
Q6ZSG2	100	108	KSTGVQTS	16.2917	4.16955	INSY2	HUMAN Inhibitory synaptic factor 2A	0	0	0.613988
O95447	355	363	STKSVQAD	13.2904	4.13873	LCA5L	HUMAN Lebercilin-like protein	0	0	0.584087
Q8WYA1	108	116	REAHSQTE	17.8691	4.12653	BMAL2	HUMAN Aryl hydrocarbon receptor nuclear translocator-like protein 2	0	0	0.866625
O15062	288	296	ASRATQVE	16.6096	4.10894	ZBTB5	HUMAN Zinc finger and BTB domain-containing protein 5	0	0	0.780438
Q12841	272	280	KGAQTQTE	13.7795	4.01409	FSTL1	HUMAN Follistatin-related protein 1	0	0	0.609038
Q9NQ11	102	110	FTVQVQTE	16.1971	4.00875	AT132	HUMAN Cation-transporting ATPase 13A2	0	0	0.535288
Q8TDF6	637	645	RHAWTQTE	21.3053	4.00143	GRP4	HUMAN RAS guanyl-releasing protein 4	0	0	0.674262
Q9HCU4	2634	2642	TTKSTLTS	13.5852	3.99943	CELR2	HUMAN Cadherin EGF LAG seven-pass G-type receptor 2	0	0	0.5288
Q9GZR7	557	565	ATVETLTE	15.9694	3.99045	DDX24	HUMAN ATP-dependent RNA helicase DDX24	0	0	0.581087
Q9C073	116	124	NDKATQTP	20.6425	3.92813	F117A	HUMAN Protein FAM117A	0	0	0.564025
Q14789	2991	2999	RSSSSQTQ	13.8135	3.89895	GOGB1	HUMAN Golgin subfamily B member 1	0	1	0.509862
O75665	156	164	CNMETQTS	23.0086	3.89393	OFD1	HUMAN Oral-facial-digital syndrome 1 protein	0	1	0.66265
Q96RL7	805	813	KSFQIQTS	14.1443	3.86957	VP13A	HUMAN Vacuolar protein sorting-associated protein 13A	0	0	0.510587
Q96LW1	92	100	MTKSTQTQ	14.0872	3.85871	Z354B	HUMAN Zinc finger protein 354B	0	0	0.695712
Q86VR7	142	150	SNISTQVS	15.468	3.81411	VS10L	HUMAN V-set and immunoglobulin domain-containing protein 10-like	0	0	0.681913
Q5VZL5	920	928	GDASTQTD	18.7989	3.79881	ZMYM4	HUMAN Zinc finger MYM-type protein 4	0	1	0.7051
Q9UPX6	471	479	SSVGTQTE	20.2972	3.78637	MNAR1	HUMAN Major intrinsically disordered Notch2-binding receptor 1	0	0	0.621363
Q13439	900	908	QTKQILVE	13.2424	3.78307	GOGA4	HUMAN Golgin subfamily A member 4	0	0	0.72175
Q86X02	381	389	RHAGVQTS	21.1211	3.77557	CDR2L	HUMAN Cerebellar degeneration-related protein 2-like	0	0	0.723738
P0C1S8	33	41	REASSQTP	16.3622	3.71981	WEE2	HUMAN Wee1-like protein kinase 2	0	0	0.889212
Q6PML9	286	294	ISKSVQTP	16.6509	3.70993	ZNT9	HUMAN Zinc transporter 9	0	0	0.529925
Q9Y2F5	257	265	RTSNVQTC	13.5633	3.70869	ICE1	HUMAN Little elongation complex subunit 1	1	0	0.677113
P02751	271	279	RHTSVQTT	17.2258	3.69553	FINC	HUMAN Fibronectin	0	0	0.59545
Q2KHR2	702	710	QDISVMTI	13.2017	3.69533	RFX7	HUMAN DNA-binding protein RFX7	0	0	0.688237
Q32P44	80	88	VSRGTQTE	20.941	3.65117	EMAL3	HUMAN Echinoderm microtubule-associated protein-like 3	0	1	0.904388
Q5VVH5	48	56	ATREVQVS	15.2271	3.63384	IKBP1	HUMAN Interleukin-1 receptor-associated kinase 1-binding protein 1	0	0	0.858387
Q14149	635	643	NTAATQTE	21.1865	3.63183	MORC3	HUMAN MORC family CW-type zinc finger protein 3	0	1	0.747938
Q86SP6	469	477	INKCTNTD	16.4689	3.59084	GP149	HUMAN Probable G-protein coupled receptor 149	0	0	0.685525
Q7Z553	384	392	RMVITQTD	14.0332	3.58488	MDGA2	HUMAN MAM domain-containing glycosylphosphatidylinositol anchor protein 2	0	0	0.816237
O43491	192	200	ETKEVQTN	13.2061	3.57583	E41L2	HUMAN Band 4.1-like protein 2	0	0	0.747
Q9UPA5	2535	2543	SDMSLQTE	14.9335	3.56569	BSN	HUMAN Protein bassoon	1	0	0.724575
Q6ZMZ0	584	592	NNMEIQVD	15.6937	3.56541	RN19B	HUMAN E3 ubiquitin-protein ligase RNF19B	0	0	0.562125
P17023	90	98	KDVETNID	14.915	3.55797	ZNF19	HUMAN Zinc finger protein 19	0	0	0.653925
O43313	735	743	SDTETQTE	22.3832	3.52637	ATMIN	HUMAN ATM interactor	1	0	0.740175
Q2M243	91	99	LSKSVQTI	14.441	3.5259	CCD27	HUMAN Coiled-coil domain-containing protein 27	0	0	0.585287
Q6PCB5	271	279	YSKSIQTI	15.0769	3.50943	RSBNL	HUMAN Round spermatid basic protein 1-like protein	0	0	0.53745
Q9H4A3	620	628	ASVSTQVE	16.0379	3.50522	WNK1	HUMAN Serine/threonine-protein kinase WNK1	0	0	0.972812
Q8IVI9	155	163	SSKQSMTE	14.1578	3.50461	NOSTN	HUMAN Nostrin	0	0	0.555412
Q68DX3	236	244	RSTETQSS	14.4723	3.50402	FRPD2	HUMAN FERM and PDZ domain-containing protein 2	0	0	0.690725
Q9ULV3	195	203	KDSSSQTM	16.0002	3.46585	CIZ1	HUMAN Cip1-interacting zinc finger protein	0	1	0.979563
Q8N2N9	720	728	KMKEVQTS	13.8636	3.46491	AN36B	HUMAN Ankyrin repeat domain-containing protein 36B	0	0	0.814263
P37198	59	67	FSLATQTP	13.7893	3.46471	NUP62	HUMAN Nuclear pore glycoprotein p62	0	0	0.5766
Q96CV9	271	279	SEIETQTE	18.9183	3.46149	OPTN	HUMAN Optineurin	0	0	0.837538
Q7Z417	385	393	STGETQTQ	15.1726	3.39441	NUFP2	HUMAN Nuclear fragile X mental retardation-interacting protein 2	0	0	0.864
Q14493	242	250	RHMDSQVE	14.0927	3.38409	SLBP	HUMAN Histone RNA hairpin-binding protein	0	0	0.510675
Q96R06	466	474	QDSSTQTD	21.7126	3.34532	SPAG5	HUMAN Sperm-associated antigen 5	1	1	0.910787
Q9UPA5	2669	2677	SDCSVQTE	16.0902	3.34436	BSN	HUMAN Protein bassoon	1	0	0.5669
P78406	260	268	RSNGTNTS	14.9546	3.34053	RAE1L	HUMAN mRNA export factor	0	0	0.527212
Q9HC10	586	594	SSTEVQVE	13.8832	3.31461	OTOF	HUMAN Otoferlin	0	0	0.797588
Q6NY19	397	405	REATTQTP	18.0621	3.30946	KANK3	HUMAN KN motif and ankyrin repeat domain-containing protein 3	0	0	0.740225
Q9BY89	1572	1580	SSLSSQTE	13.4356	3.29782	K1671	HUMAN Uncharacterized protein KIAA1671	0	0	0.881138
Q4VXU2	481	489	ANIGTQTT	18.9347	3.26311	PAP1L	HUMAN Polyadenylate-binding protein 1-like	0	0	0.77085
O14974	877	885	NKKETQTD	13.9741	3.25734	MYPT1	HUMAN Protein phosphatase 1 regulatory subunit 12A	0	0	0.879575
Q9NXC2	359	367	QNIAIMTE	14.383	3.25668	GFOD1	HUMAN Glucose-fructose oxidoreductase domain-containing protein 1	0	0	0.576525
Q00013	402	410	TDQGTQTE	17.9594	3.25184	EM55	HUMAN 55 kDa erythrocyte membrane protein	0	0	0.522725
Q03001	6558	6566	KSAETNID	15.9611	3.24402	DYST	HUMAN Dystonin	0	0	0.635288
P15924	1948	1956	SHRETQTE	22.4652	3.22866	DESP	HUMAN Desmoplakin	0	1	0.512725
Q9Y2H0	664	672	SSIGIQVD	16.3009	3.21835	DLGP4	HUMAN Disks large-associated protein 4	0	0	0.568712
Q6WRI0	1329	1337	ITYETQTE	18.682	3.21645	IGS10	HUMAN Immunoglobulin superfamily member 10	0	0	0.718475
P50851	1174	1182	KDSGIQTM	18.1059	3.20236	LRBA	HUMAN Lipopolysaccharide-responsive and beige-like anchor protein	0	0	0.925913
Q6AWC2	961	969	VDKETNTD	21.008	3.2023	WWC2	HUMAN Protein WWC2	1	0	0.921737
P98088	1869	1877	KTTETQAS	13.4406	3.19197	MUC5A	HUMAN Mucin-5AC	0	0	0.913538
Q8N4S9	161	169	LDRHTQTV	14.3313	3.18801	MALD2	HUMAN MARVEL domain-containing protein 2	0	0	0.62995
P08842	533	541	ADRHTQTL	19.1096	3.18705	STS	HUMAN Steryl-sulfatase	0	0	0.522075
O75363	565	573	LDAQVQTD	19.4008	3.17946	BCAS1	HUMAN Breast carcinoma-amplified sequence 1	0	1	0.562
Q03164	3059	3067	SNAAVQTT	14.4312	3.17902	KMT2A	HUMAN Histone-lysine N-methyltransferase 2A	0	0	0.961625
Q8IYR0	575	583	KDTSTQSM	13.8924	3.17643	CF206	HUMAN Cilia- and flagella-associated protein 206	0	0	0.9338
P20930	2950	2958	GTRHTQTS	16.1766	3.12277	FILA	HUMAN Filaggrin	0	0	0.976662
Q6IMN6	794	802	TTASTQTP	20.0861	3.11346	CAPR2	HUMAN Caprin-2	1	0	0.682725
Q9H4H8	386	394	IDAATQTE	20.7331	3.11213	FA83D	HUMAN Protein FAM83D	1	1	0.929362
Q8IVW4	329	337	KTVYTNTL	13.8687	3.10352	CDKL3	HUMAN Cyclin-dependent kinase-like 3	0	0	0.525637
Q8WWL7	1070	1078	SSIATMTS	14.208	3.0891	CCNB3	HUMAN G2/mitotic-specific cyclin-B3	0	0	0.71625
Q15746	1449	1457	RTVTINTE	14.94	3.0808	MYLK	HUMAN Myosin light chain kinase, smooth muscle	0	0	0.622212
Q5TFQ8	295	303	ETASTLTE	13.713	3.07867	SIRBL	HUMAN Signal-regulatory protein beta-1 isoform 3	0	0	0.551087
Q01484	2894	2902	SSITTQTD	19.7381	3.07149	ANK2	HUMAN Ankyrin-2	0	0	0.717762
Q6N021	490	498	QTAGTMTV	14.4618	3.06857	TET2	HUMAN Methylcytosine dioxygenase TET2	0	0	0.609313
Q8IV61	609	617	TSQATQTE	15.2649	3.04008	GRP3	HUMAN Ras guanyl-releasing protein 3	1	1	0.617838
Q8WZB0	31	39	ATKGTQAE	16.6111	3.03436	CI130	HUMAN Putative uncharacterized protein encoded by LINC00476	0	0	0.807187
Q8IX03	886	894	VDKETNTE	20.1073	3.01827	KIBRA	HUMAN Protein KIBRA	1	1	0.912538
Q8WXI7	3105	3113	TTAETQTL	18.4941	3.00926	MUC16	HUMAN Mucin-16	0	0	0.912575
Q9UPA5	2580	2588	ADSSVQTD	16.6329	2.92763	BSN	HUMAN Protein bassoon	1	0	0.691163
Q9UPA5	2607	2615	ADCSVQTD	17.1849	2.92763	BSN	HUMAN Protein bassoon	1	0	0.578
Q86UR5	1112	1120	RSASTNCL	14.1155	2.90464	RIMS1	HUMAN Regulating synaptic membrane exocytosis protein 1	0	0	0.585213
Q8NFN8	676	684	GSKQSQTE	13.6034	2.90385	GP156	HUMAN Probable G-protein coupled receptor 156	0	0	0.978113
Q9BQ95	395	403	STRELQTS	13.8852	2.89989	ECSIT	HUMAN Evolutionarily conserved signaling intermediate in Toll pathway, mitochondrial	0	0	0.564675
Q9Y4F4	791	799	QTFGSQTE	16.9478	2.89815	TGRM1	HUMAN TOG array regulator of axonemal microtubules protein 1	0	0	0.602387
Q9HD43	35	43	LTVETQTT	17.9457	2.89681	PTPRH	HUMAN Receptor-type tyrosine-protein phosphatase H	0	0	0.783725
Q96LC9	65	73	EDKATQTL	16.16	2.87135	BMF	HUMAN Bcl-2-modifying factor	1	1	0.904312
P24588	160	168	LDIQTQTP	20.3216	2.84231	AKAP5	HUMAN A-kinase anchor protein 5	0	0	0.61525
O60721	322	330	VTISTMTG	15.2334	2.8282	NCKX1	HUMAN Sodium/potassium/calcium exchanger 1	0	0	0.74165
Q8N7U7	365	373	SSVSTMTS	13.327	2.82604	TPRX1	HUMAN Tetra-peptide repeat homeobox protein 1	0	0	0.798875
Q53SF7	849	857	KETAIQTE	13.3071	2.80783	COBL1	HUMAN Cordon-bleu protein-like 1	0	0	0.921013
O43548	427	435	STKSIQSD	13.8393	2.80403	TGM5	HUMAN Protein-glutamine gamma-glutamyltransferase 5	0	0	0.573588
O00562	278	286	RSAASNTG	13.7849	2.79132	PITM1	HUMAN Membrane-associated phosphatidylinositol transfer protein 1	0	0	0.991812
Q9UHC1	882	890	SERETQTM	19.1	2.78016	MLH3	HUMAN DNA mismatch repair protein Mlh3	0	0	0.79545
P11717	986	994	CEAETQTE	21.2143	2.77665	MPRI	HUMAN Cation-independent mannose-6-phosphate receptor	0	0	0.565913
O43313	488	496	VSRETQTS	20.0057	2.77066	ATMIN	HUMAN ATM interactor	1	0	0.7998
P49750	928	936	QSMETQID	21.4909	2.758	YLPM1	HUMAN YLP motif-containing protein 1	0	0	0.781625
Q02383	431	439	GSISIQTE	13.3174	2.75318	SEMG2	HUMAN Semenogelin-2	0	0	0.663913
Q9HAU0	103	111	QTVATMTS	15.8555	2.7288	PKHA5	HUMAN Pleckstrin homology domain-containing family A member 5	0	0	0.613237
Q96EX3	82	90	VDAQVQTE	19.4795	2.72073	WDR34	HUMAN WD repeat-containing protein 34	0	0	0.835413
Q9H2U2	154	162	KDKSTNCF	13.8622	2.71492	IPYR2	HUMAN Inorganic pyrophosphatase 2, mitochondrial	0	0	0.65385
Q6NT76	85	93	ATASTQTQ	20.5912	2.71384	HMBX1	HUMAN Homeobox-containing protein 1	0	1	0.936312
Q8NEL9	793	801	TTVGTQTL	15.5441	2.71203	DDHD1	HUMAN Phospholipase DDHD1	0	0	0.829662
P59817	201	209	STISTNTP	17.5197	2.70958	Z280A	HUMAN Zinc finger protein 280A	0	0	0.639663
P34932	751	759	QNKQSLTM	14.0639	2.70497	HSP74	HUMAN Heat shock 70 kDa protein 4	0	0	0.540525
Q9H799	2554	2562	QDASTNTD	21.5974	2.67001	CPLN1	HUMAN Ciliogenesis and planar polarity effector 1	0	0	0.893225
Q7Z7B0	800	808	TSTGVQTD	15.5945	2.64145	FLIP1	HUMAN Filamin-A-interacting protein 1	0	0	0.801963
Q01955	1447	1455	FTRHSQTT	13.9943	2.63572	CO4A3	HUMAN Collagen alpha-3(IV) chain	0	0	0.57705
Q9ULH7	879	887	QTRSTQAP	14.9936	2.63125	MRTFB	HUMAN Myocardin-related transcription factor B	0	0	0.890375
P29590	477	485	KCSQTQCP	13.2074	2.61021	PML	HUMAN Protein PML	0	0	0.530525
Q96JQ0	1012	1020	TTAGTQVL	13.9877	2.60984	PCD16	HUMAN Protocadherin-16	0	0	0.801787
Q9NRC6	1686	1694	QTAQTLTG	16.938	2.58253	SPTN5	HUMAN Spectrin beta chain, non-erythrocytic 5	0	0	0.684512
Q9HAR2	1371	1379	VTTSTQTE	20.6127	2.58169	AGRL3	HUMAN Adhesion G protein-coupled receptor L3	0	0	0.92805
Q9Y6V0	3467	3475	VDTSVQTD	17.8213	2.57206	PCLO	HUMAN Protein piccolo	0	0	0.728612
P03989	83	91	WDRETQIC	16.9888	2.56395	1B27	HUMAN HLA class I histocompatibility antigen, B-27 alpha chain	0	0	0.605463
P30488	83	91	WDRETQIS	17.2251	2.56395	1B50	HUMAN HLA class I histocompatibility antigen, B-50 alpha chain	0	0	0.6608
P49901	94	102	QDKGCQTQ	17.3102	2.5554	MCSP	HUMAN Sperm mitochondrial-associated cysteine-rich protein	0	0	0.980337
O00592	344	352	EDLETQTQ	14.0579	2.55507	PODXL	HUMAN Podocalyxin	0	0	0.5325
P09172	211	219	CTMEVQAP	13.727	2.55347	DOPO	HUMAN Dopamine beta-hydroxylase	0	0	0.825987
Q9Y6V0	3703	3711	TTKGSQTM	18.7124	2.54696	PCLO	HUMAN Protein piccolo	0	0	0.6211
Q8WXI7	6884	6892	STAATNVE	14.4285	2.54311	MUC16	HUMAN Mucin-16	0	0	0.9094
Q6P1L5	552	560	ASLSTNTE	13.5303	2.54138	F117B	HUMAN Protein FAM117B	0	1	0.6194
O95267	668	676	AHKATQTE	22.1774	2.53092	GRP1	HUMAN RAS guanyl-releasing protein 1	0	0	0.623525
Q9HCM3	1513	1521	INKEIQTA	14.3715	2.49111	K1549	HUMAN UPF0606 protein KIAA1549	0	0	0.802813
P16150	19	27	STTAVQTP	16.0898	2.48264	LEUK	HUMAN Leukosialin	0	0	0.76305
Q13740	294	302	SNTYTLTD	13.6787	2.45056	CD166	HUMAN CD166 antigen	0	0	0.558813
Q9Y2F5	184	192	RHIGTQIS	19.335	2.44901	ICE1	HUMAN Little elongation complex subunit 1	1	0	0.657625
Q96PZ7	1734	1742	RTSDTQCS	14.6027	2.44239	CSMD1	HUMAN CUB and sushi domain-containing protein 1	0	0	0.52235
Q96DB5	294	302	EDKQIQTE	18.5794	2.44194	RMD1	HUMAN Regulator of microtubule dynamics protein 1	0	0	0.670425
O14490	649	657	LSIGIQVD	14.5499	2.43454	DLGP1	HUMAN Disks large-associated protein 1	0	1	0.581762
Q9NRE1	48	56	LTQETQTQ	16.4243	2.42426	MMP26	HUMAN Matrix metalloproteinase-26	0	0	0.5328
Q86VP1	487	495	NDASVNTD	14.8655	2.3953	TAXB1	HUMAN Tax1-binding protein 1	0	0	0.773162
Q12849	61	69	QTRGLQTG	14.5162	2.39003	GRSF1	HUMAN G-rich sequence factor 1	0	0	0.744313
Q99102	209	217	TTRESQTS	15.6501	2.38601	MUC4	HUMAN Mucin-4	1	0	0.770038
Q9UHL3	102	110	ADAGTQTN	18.1879	2.38461	F153A	HUMAN Protein FAM153A	0	0	0.8645
Q15884	291	299	CEAATQTE	19.0965	2.37724	F1892	HUMAN Protein FAM189A2	0	0	0.545075
Q92508	1125	1133	RMAGVNTD	13.1972	2.37249	PIEZ1	HUMAN Piezo-type mechanosensitive ion channel component 1	0	0	0.731075
P01589	217	225	TDFQIQTE	13.7867	2.36921	IL2RA	HUMAN Interleukin-2 receptor subunit alpha	0	0	0.5059
Q9H329	705	713	TTAATQVS	14.8345	2.3519	E41LB	HUMAN Band 4.1-like protein 4B	0	0	0.767863
D6RIA3	1517	1525	SSKGSQVS	13.6328	2.34137	CD054	HUMAN Uncharacterized protein C4orf54	0	0	0.873425
Q8IYK2	402	410	RHVGTQLP	14.2347	2.30832	CC105	HUMAN Coiled-coil domain-containing protein 105	0	0	0.591137
Q99959	632	640	QNRNIQTD	16.6997	2.29981	PKP2	HUMAN Plakophilin-2	0	0	0.500713
Q9UPQ7	353	361	VDTGTQTD	21.8486	2.25246	PZRN3	HUMAN E3 ubiquitin-protein ligase PDZRN3	0	0	0.587113
Q12816	350	358	RATESQTP	15.2336	2.24991	TROP	HUMAN Trophinin	0	0	0.9109
Q12888	1191	1199	QDATVQTE	19.0792	2.23133	TP53B	HUMAN TP53-binding protein 1	1	1	0.873637
Q5JTC6	334	342	QDMDSMTD	13.6191	2.22549	AMER1	HUMAN APC membrane recruitment protein 1	0	0	0.7545
Q14687	677	685	LEKSTQTI	14.0906	2.21896	GSE1	HUMAN Genetic suppressor element 1	0	0	0.613313
P11142	420	428	PTKQTQTF	15.3544	2.20839	HSP7C	HUMAN Heat shock cognate 71 kDa protein	0	1	0.536613
A6NCI8	315	323	SSRNTQTL	13.323	2.20614	CB078	HUMAN Uncharacterized protein C2orf78	0	0	0.768463
Q12955	3725	3733	ISASTMTM	16.0669	2.19798	ANK3	HUMAN Ankyrin-3	0	0	0.7001
Q9UKV3	746	754	QTSETQTS	20.7622	2.15485	ACINU	HUMAN Apoptotic chromatin condensation inducer in the nucleus	0	0	0.98965
Q8N1N0	385	393	ASREIQTL	15.8914	2.15166	CLC4F	HUMAN C-type lectin domain family 4 member F	0	0	0.63885
Q9Y6V0	3440	3448	VDSGVQTD	16.2777	2.15027	PCLO	HUMAN Protein piccolo	0	0	0.702412
Q8N2G8	98	106	LTKASQTQ	14.2932	2.1483	GHDC	HUMAN GH3 domain-containing protein	0	0	0.916188
Q9ULU4	1072	1080	ADAEVNTE	16.8912	2.14812	PKCB1	HUMAN Protein kinase C-binding protein 1	0	0	0.882687
O95789	708	716	QHKECQTD	20.8146	2.14124	ZMYM6	HUMAN Zinc finger MYM-type protein 6	0	0	0.795162
P24530	40	48	QTAEIMTP	18.0458	2.13328	EDNRB	HUMAN Endothelin receptor type B	0	0	0.788787
O00327	73	81	REAHSQIE	13.2277	2.11513	BMAL1	HUMAN Aryl hydrocarbon receptor nuclear translocator-like protein 1	0	0	0.842325
Q9NQX3	205	213	EDKGVQCE	15.0488	2.11092	GEPH	HUMAN Gephyrin	0	1	0.914837
Q9P2G1	1068	1076	SDVSSQTP	15.6191	2.08895	AKIB1	HUMAN Ankyrin repeat and IBR domain-containing protein 1	0	0	0.931675
Q8N7Z5	733	741	QHKRTQVD	15.2815	2.0836	ANR31	HUMAN Putative ankyrin repeat domain-containing protein 31	0	0	0.770362
Q93033	148	156	ATMSSQTL	15.6362	2.08049	IGSF2	HUMAN Immunoglobulin superfamily member 2	0	0	0.649787
Q15596	999	1007	QTLQSQVM	13.9108	2.06188	NCOA2	HUMAN Nuclear receptor coactivator 2	0	0	0.892988
A8MYU2	1058	1066	VNKASQTT	13.5673	2.05761	KCNU1	HUMAN Potassium channel subfamily U member 1	0	0	0.697588
Q14676	518	526	VDINTQVE	14.1582	2.04071	MDC1	HUMAN Mediator of DNA damage checkpoint protein 1	0	0	0.738675
Q6ZNE9	179	187	CSSSTQTQ	16.3578	2.038	RUFY4	HUMAN RUN and FYVE domain-containing protein 4	0	0	0.835213
P51608	238	246	ATTSTQVM	18.2266	2.01746	MECP2	HUMAN Methyl-CpG-binding protein 2	0	0	0.876838
P11940	482	490	ANTSTQTM	20.0522	2.01746	PABP1	HUMAN Polyadenylate-binding protein 1	0	1	0.905475
Q14624	718	726	TTMTTQTP	17.6396	1.99714	ITIH4	HUMAN Inter-alpha-trypsin inhibitor heavy chain H4	0	0	0.746613
Q9P0W8	272	280	IEAETQTE	17.8434	1.99284	SPAT7	HUMAN Spermatogenesis-associated protein 7	0	0	0.57405
Q6P2Q9	2059	2067	SNYETQTF	14.7788	1.96634	PRP8	HUMAN Pre-mRNA-processing-splicing factor 8	0	0	0.506775
Q12888	1149	1157	NNIGIQTM	17.7741	1.95998	TP53B	HUMAN TP53-binding protein 1	1	1	0.583488
Q9ULM0	57	65	ENAETQVG	13.6667	1.95117	PKHH1	HUMAN Pleckstrin homology domain-containing family H member 1	0	0	0.549388
P04279	311	319	SSIYSQTE	17.2492	1.92415	SEMG1	HUMAN Semenogelin-1	0	0	0.644188
P29400	1463	1471	ITRHSQTT	14.4006	1.91825	CO4A5	HUMAN Collagen alpha-5(IV) chain	0	0	0.756525
Q5VUA4	1772	1780	SEIETNTE	14.5448	1.915	ZN318	HUMAN Zinc finger protein 318	0	0	0.585788
Q13214	609	617	VTAHTQVL	15.4472	1.89743	SEM3B	HUMAN Semaphorin-3B	0	0	0.572837
A3KMH1	704	712	ATIEINTD	18.1434	1.87594	VWA8	HUMAN von Willebrand factor A domain-containing protein 8	0	0	0.513238
O43586	328	336	ASTETLTP	13.6022	1.87589	PPIP1	HUMAN Proline-serine-threonine phosphatase-interacting protein 1	0	0	0.892175
Q8WXI7	9794	9802	ATSEIMTD	14.0592	1.86641	MUC16	HUMAN Mucin-16	0	0	0.836137
O43493	69	77	SSAEAQTP	13.9407	1.85482	TGON2	HUMAN Trans-Golgi network integral membrane protein 2	0	1	0.98825
Q01850	374	382	SHKAVQTS	16.9676	1.85174	CDR2	HUMAN Cerebellar degeneration-related protein 2	0	0	0.601425
Q05048	84	92	FDADVQTM	14.8004	1.84216	CSTF1	HUMAN Cleavage stimulation factor subunit 1	0	0	0.6774
Q8NEZ4	208	216	VSVSTQTA	14.1917	1.84014	KMT2C	HUMAN Histone-lysine N-methyltransferase 2C	0	0	0.577875
O43313	760	768	NSTETQTM	20.1757	1.83485	ATMIN	HUMAN ATM interactor	1	0	0.53055
Q6ZN03	48	56	LDTSVQTP	14.9074	1.82477	CU136	HUMAN Putative uncharacterized protein encoded by LINC00322	0	0	0.728113
Q9NPA5	86	94	ITSETQTI	15.7385	1.81203	ZF64A	HUMAN Zinc finger protein 64 homolog, isoforms 1 and 2	0	0	0.647437
Q9H7F0	125	133	ISKYSQTE	16.9393	1.78342	AT133	HUMAN Probable cation-transporting ATPase 13A3	0	0	0.72975
O60500	1024	1032	ADKGTQLP	15.1671	1.77375	NPHN	HUMAN Nephrin	0	0	0.718137
A7KAX9	1003	1011	ASGQTQTG	13.9622	1.75942	RHG32	HUMAN Rho GTPase-activating protein 32	0	0	0.898563
Q9Y5G6	223	231	STAHIQVT	14.5604	1.73266	PCDG7	HUMAN Protocadherin gamma-A7	0	0	0.761338
Q9UER7	721	729	TSVATQCD	14.3265	1.73021	DAXX	HUMAN Death domain-associated protein 6	0	0	0.657687
Q5QJE6	44	52	TTAESQTT	15.3404	1.72986	TDIF2	HUMAN Deoxynucleotidyltransferase terminal-interacting protein 2	0	0	0.936712
O15015	1188	1196	AEKGCQTE	13.7313	1.7136	ZN646	HUMAN Zinc finger protein 646	0	0	0.663
Q8IX01	695	703	ATTGTQTL	18.2889	1.69787	SUGP2	HUMAN SURP and G-patch domain-containing protein 2	0	0	0.640813
Q99102	785	793	ASGQTQTS	14.5244	1.68681	MUC4	HUMAN Mucin-4	1	0	0.971113
Q8WXI7	5472	5480	QTNQIQTE	17.9002	1.68615	MUC16	HUMAN Mucin-16	0	0	0.891737
O00468	1009	1017	STAHSQTT	16.908	1.67655	AGRIN	HUMAN Agrin	0	0	0.984163
Q8N5C7	20	28	ETKQSQTT	14.5799	1.66891	DTWD1	HUMAN DTW domain-containing protein 1	0	0	0.707337
P32241	427	435	ATCSTQVS	14.5346	1.65734	VIPR1	HUMAN Vasoactive intestinal polypeptide receptor 1	0	0	0.7719
Q9NR71	77	85	SSTATQTS	17.4262	1.63527	ASAH2	HUMAN Neutral ceramidase	0	0	0.897075
P07359	570	578	LTTATQTT	16.01	1.62621	GP1BA	HUMAN Platelet glycoprotein Ib alpha chain	0	0	0.727275
Q9Y4F5	1278	1286	TSTATQTP	15.6226	1.61946	C170B	HUMAN Centrosomal protein of 170 kDa protein B	0	0	0.982625
Q9UPA5	1425	1433	ANYGSQTE	13.5576	1.60928	BSN	HUMAN Protein bassoon	1	0	0.874238
Q8IUG5	2228	2236	ASRSTNTS	15.3239	1.60212	MY18B	HUMAN Unconventional myosin-XVIIIb	0	0	0.911312
Q96CC6	73	81	QTSITQTI	13.9003	1.57707	RHDF1	HUMAN Inactive rhomboid protein 1	0	0	0.527462
Q6ZUS5	116	124	QEKEIQTL	15.4229	1.56482	CC121	HUMAN Coiled-coil domain-containing protein 121	0	0	0.52135
A0JNW5	1394	1402	VTQATQTS	16.7784	1.56481	UH1BL	HUMAN UHRF1-binding protein 1-like	0	1	0.790063
Q8N8Z6	47	55	QDSGTMTS	15.0626	1.56178	DCBD1	HUMAN Discoidin, CUB and LCCL domain-containing protein 1	0	0	0.505725
P02462	1447	1455	VTRHSQTI	14.9156	1.53213	CO4A1	HUMAN Collagen alpha-1(IV) chain	0	0	0.771513
Q6ZNB6	128	136	ITYTTQTD	15.7345	1.51949	NFXL1	HUMAN NF-X1-type zinc finger protein NFXL1	0	0	0.568813
P10276	58	66	ATIETQSS	14.2602	1.51076	RARA	HUMAN Retinoic acid receptor alpha	0	0	0.8883
Q96MU6	100	108	ASNETQTA	13.5968	1.50654	ZN778	HUMAN Zinc finger protein 778	0	0	0.69155
Q9BYP7	850	858	NSTSTQTS	16.8117	1.4971	WNK3	HUMAN Serine/threonine-protein kinase WNK3	0	0	0.908875
Q8IX03	74	82	NTKTTQIE	15.5798	1.4668	KIBRA	HUMAN Protein KIBRA	1	1	0.617812
Q8ND24	211	219	ADSEVNTD	13.5335	1.46096	RN214	HUMAN RING finger protein 214	0	0	0.641425
Q15326	450	458	LHRSTQTT	16.6607	1.45445	ZMY11	HUMAN Zinc finger MYND domain-containing protein 11	1	0	0.71915
B1AJZ9	1107	1115	CDTSVQIE	14.7854	1.43515	FHAD1	HUMAN Forkhead-associated domain-containing protein 1	0	0	0.718688
O95359	1711	1719	STAETQAC	14.4805	1.42667	TACC2	HUMAN Transforming acidic coiled-coil-containing protein 2	0	0	0.7342
Q8ND82	218	226	LSKGTNTS	15.6252	1.40188	Z280C	HUMAN Zinc finger protein 280C	0	0	0.65745
Q96A65	740	748	QDSHTNTD	17.8121	1.36758	EXOC4	HUMAN Exocyst complex component 4	0	0	0.9344
Q9HAW4	382	390	VSKETQII	15.4698	1.31962	CLSPN	HUMAN Claspin	0	0	0.594575
Q7Z4U5	120	128	TAKGTQTG	14.7532	1.25934	CF201	HUMAN Uncharacterized protein C6orf201	0	0	0.6908
Q9H4H8	404	412	SEVGTQTS	14.931	1.19949	FA83D	HUMAN Protein FAM83D	1	1	0.757962
Q9HD43	391	399	LHMETQTN	15.8828	1.19361	PTPRH	HUMAN Receptor-type tyrosine-protein phosphatase H	0	0	0.622812
O00461	189	197	QDIHTQLQ	13.3083	1.18007	GOLI4	HUMAN Golgi integral membrane protein 4	0	0	0.72535
O15061	1253	1261	ESVGTQTS	15.6236	1.17591	SYNEM	HUMAN Synemin	0	0	0.549725
Q4FZB7	373	381	QSVSSNTD	13.7966	1.16963	KMT5B	HUMAN Histone-lysine N-methyltransferase KMT5B	0	0	0.870988
Q16656	282	290	EDQQTQTQ	14.0061	1.16778	NRF1	HUMAN Nuclear respiratory factor 1	0	1	0.53155
Q8WXI7	5995	6003	SEASTNTE	13.8324	1.15034	MUC16	HUMAN Mucin-16	0	0	0.727725
Q6ZRS4	757	765	NDASIQTS	17.3774	1.14315	ITPI1	HUMAN Protein ITPRID1	0	0	0.676338
P78364	322	330	VSQGSQTE	14.042	1.04852	PHC1	HUMAN Polyhomeotic-like protein 1	0	0	0.688875
Q8WXI7	4384	4392	VTITTQTG	17.4201	1.02705	MUC16	HUMAN Mucin-16	0	0	0.747325
Q96R06	393	401	QEKSTNTS	14.8553	1.01528	SPAG5	HUMAN Sperm-associated antigen 5	1	1	0.736513
P51815	290	298	STSEIQTS	16.1265	1.00321	ZN75D	HUMAN Zinc finger protein 75D	0	0	0.730888
Q8WXI7	5499	5507	STTETNTA	13.5615	0.966215	MUC16	HUMAN Mucin-16	0	0	0.714812
Q96JN2	277	285	TSAESQTS	15.0056	0.955096	CC136	HUMAN Coiled-coil domain-containing protein 136	0	0	0.823825
Q86UE8	203	211	QHRQTQSD	15.8673	0.931096	TLK2	HUMAN Serine/threonine-protein kinase tousled-like 2	0	1	0.513713
Q9P0Z9	317	325	SCMYTNTP	15.0974	0.930497	SOX	HUMAN Peroxisomal sarcosine oxidase	0	0	0.543312
Q8WXI7	5711	5719	ASMHTNTA	13.671	0.902811	MUC16	HUMAN Mucin-16	0	0	0.671637
Q96QB1	733	741	VSNSTQTS	14.4817	0.896345	RHG07	HUMAN Rho GTPase-activating protein 7	0	0	0.866213
Q5JTZ9	663	671	LDVTTQTP	15.568	0.894791	SYAM	HUMAN Alanine--tRNA ligase, mitochondrial	0	0	0.8472
Q6ZWK4	66	74	EMKETQTE	14.9764	0.880018	RHEX	HUMAN Regulator of hemoglobinization and erythroid cell expansion protein	0	1	0.949625
Q5VWG9	357	365	QVKQIQTP	13.6826	0.857416	TAF3	HUMAN Transcription initiation factor TFIID subunit 3	0	0	0.720437
Q9Y6D5	621	629	VSSGTQTT	14.7741	0.843905	BIG2	HUMAN Brefeldin A-inhibited guanine nucleotide-exchange protein 2	0	0	0.774038
Q9NUZ1	99	107	NARGIQTE	13.4099	0.829542	ACOXL	HUMAN Acyl-coenzyme A oxidase-like protein	0	0	0.5994
Q14790	214	222	QDSESQTL	13.9119	0.828321	CASP8	HUMAN Caspase-8	0	0	0.808725
Q49AR2	188	196	NTASTNCD	15.509	0.806542	CE022	HUMAN UPF0489 protein C5orf22	0	0	0.77585
Q8WYP5	1718	1726	QETSTMTM	13.6887	0.722791	ELYS	HUMAN Protein ELYS	0	0	0.512825
Q9H0A0	433	441	QSAQSQVS	14.5688	0.713691	NAT10	HUMAN RNA cytidine acetyltransferase	0	0	0.54465
Q68DE3	644	652	ASNSTQTF	13.5238	0.60012	USF3	HUMAN Basic helix-loop-helix domain-containing protein USF3	0	0	0.6732
Q9P2F8	360	368	ASAASQTQ	13.9578	0.598022	SI1L2	HUMAN Signal-induced proliferation-associated 1-like protein 2	0	0	0.810075
O95944	145	153	VSSQTQTQ	14.3063	0.543189	NCTR2	HUMAN Natural cytotoxicity triggering receptor 2	0	0	0.761888
Q96JG8	186	194	TSAQSQTG	13.6239	0.511596	MAGD4	HUMAN Melanoma-associated antigen D4	0	0	0.970163
Q5W0A0	215	223	ASYSSQTM	13.94	0.501476	ERI6B	HUMAN Glutamate-rich protein 6B	0	0	0.53715
Q49A88	273	281	VHSEVQTD	15.79	0.457483	CCD14	HUMAN Coiled-coil domain-containing protein 14	0	0	0.83565
Q96T58	3390	3398	EAKGTQTG	14.0472	0.38658	MINT	HUMAN Msx2-interacting protein	0	0	0.96395
P0C7A2	179	187	ADTGIQTN	13.3048	0.280922	F153B	HUMAN Protein FAM153B	0	0	0.770537
Q9UPE1	343	351	LSAGSQTS	14.9596	0.229635	SRPK3	HUMAN SRSF protein kinase 3	0	0	0.679362
			a Proteins that are present in the LC8Hub database and were found in the proteome search
			b Proeins that are listed on the Mentha website as LC8 interacting partners, determined via high-throughput experimentation
			c Disorder score
